# Supplementary material for: Socio-economic drivers of drug-resistant tuberculosis in Africa: a scoping review
Source: BMC Public Health. 2021 Mar 11;21:488. doi: 10.1186/s12889-021-10267-0 (PMC7953648; doi:10.1186/s12889-021-10267-0)
Supplement: Supplementary file 4 — Additional file 4:. Addendum 4.1: MMAT Quality Assessment Checklist. [file 12889_2021_10267_MOESM4_ESM.xlsx]

## Sheet: MMAT checklist
				SCREENING QUESTIONS		1. QUALITATIVE STUDIES					2. RANDOMIZED CONTROLLED TRIALS					3. NON-RANDOMIZED STUDIES					4. QUANTITATIVE DESCRIPTIVE STUDIES					5. MIXED METHODS STUDIES					COMMENTS
RefID	First author	Year	Citation	S1. Are there clear research questions?	S2. Do the collected data allow to address the research questions?	1.1. Is the qualitative approach appropriate to answer the research question?	1.2. Are the qualitative data collection methods adequate to address the research question?	1.3. Are the findings adequately derived from the data?	1.4. Is the interpretation of results sufficiently substantiated by data?	1.5. Is there coherence between qualitative data sources, collection, analysis and interpretation?	2.1. Is randomization appropriately performed?	2.2. Are the groups comparable at baseline?	2.3. Are there complete outcome data?	2.4. Are outcome assessors blinded to the intervention provided?	2.5 Did the participants adhere to the assigned intervention?	3.1. Are the participants representative of the target population?	3.2. Are measurements appropriate regarding both the outcome and intervention (or exposure)?	3.3. Are there complete outcome data?	3.4. Are the confounders accounted for in the design and analysis?	3.5. During the study period, is the intervention administered (or exposure occurred) as intended?	4.1. Is the sampling strategy relevant to address the research question?	4.2. Is the sample representative of the target population?	4.3. Are the measurements appropriate?	4.4. Is the risk of nonresponse bias low?	4.5. Is the statistical analysis appropriate to answer the research question?	5.1. Is there an adequate rationale for using a mixed methods design to address the research question?	5.2. Are the different components of the study effectively integrated to answer the research question?	5.3. Are the outputs of the integration of qualitative and quantitative components adequately interpreted?	5.4. Are divergences and inconsistencies between quantitative and qualitative results adequately addressed?	5.5. Do the different components of the study adhere to the quality criteria of each tradition of the methods involved?
1	Workicho et al.	2017	Workicho, A., Kassahun, W., and Alemseged, F., Risk factors for multidrug-resistant tuberculosis among tuberculosis patients: a case-control study. Infection and drug resistance, 2017. 10: p. 91.	Yes	Yes											Yes	Yes	Yes	No	Yes											six= 85, 7%
2	Gandhi et al.	2012	Gandhi, N.R., Andrews, J.R., Brust, J.C.M., Montreuil, R., Weissman, D., Heo, M., et al., Risk factors for mortality among MDR-and XDR-TB patients in a high HIV prevalence setting. The International Journal of Tuberculosis and Lung Disease, 2012. 16(1): p. 90-97.	Yes	Yes											Yes	Yes	Yes	Can't tell	Yes											six= 85, 7%
3	Mulisa et al.	2015	Mulisa, G., Workneh, T., Hordofa, N., Suaudi, M., Abebe, G., and Jarso, G., Multidrug-resistant Mycobacterium tuberculosis and associated risk factors in Oromia Region of Ethiopia. International Journal of Infectious Diseases, 2015. 39: p. 57-61.	Yes	Yes											Yes	Yes	Yes	Yes	Yes											seven= 100%
4	Mekonnen et al.	2015	Mekonnen, F., Tessema, B., Moges, F., Gelaw, A., Eshetie, S., and Kumera, G., Multidrug resistant tuberculosis: prevalence and risk factors in districts of metema and west armachiho, Northwest Ethiopia. BMC infectious diseases, 2015. 15(1): p. 461.	Yes	Yes											Yes	Yes	Yes	Yes	Yes											seven= 100%
5	Roba et al.	2018	Roba, A.A., Dasa, T.T., Weldegebreal, F., Asfaw, A., Mitiku, H., Teklemariam, Z., et al., Tuberculosis patients are physically challenged and socially isolated: A mixed methods case-control study of Health Related Quality of Life in Eastern Ethiopia. PloS one, 2018. 13(10).	Yes	Yes	Yes	Yes	Yes	Yes	Can't tell						Yes	Yes	Yes	Yes	Can't tell											six= 85, 7%
6	Van den Hof et al.	2016	Van Den Hof, S., Collins, D., Hafidz, F., Beyene, D., Tursynbayeva, A., and Tiemersma, E., The socioeconomic impact of multidrug resistant tuberculosis on patients: results from Ethiopia, Indonesia and Kazakhstan. BMC infectious diseases, 2016. 16(1): p. 470.	Yes	Yes											Yes	Yes	Yes	Can't tell	Yes											six= 85, 7%
7	Ramma et al.	2015	Ramma, L., Cox, H., Wilkinson, L., Foster, N., Cunnama, L., Vassall, A., et al., Patients' costs associated with seeking and accessing treatment for drug-resistant tuberculosis in South Africa. The international journal of tuberculosis and lung disease, 2015. 19(12): p. 1513-1519.	Yes	Yes											Yes	Yes	Yes	No	Yes											six= 85, 7%
8	Du Toit et al	2015	Du Toit, E., Squire, S.B., Dunbar, R., Machekano, R., Madan, J., Beyers, N., et al., Comparing multidrug-resistant tuberculosis patient costs under molecular diagnostic algorithms in South Africa. The International Journal of Tuberculosis and Lung Disease, 2015. 19(8): p. 960-968.	Yes	Yes											Yes	Yes	Yes	Yes	Yes											seven= 100%
9	Xavier et al.	2015	Xavier, P.B. and Peixoto, B., Emotional distress in Angolan patients with several types of tuberculosis. African health sciences, 2015. 15(2): p. 378-384.	Yes	Yes											Can't tell	Yes	Yes	Yes	Yes											six= 85, 7%
10	Mulu et al.	2015	Mulu, W., Mekkonnen, D., Yimer, M., Admassu, A., and Abera, B., Risk factors for multidrug resistant tuberculosis patients in Amhara National Regional State. African health sciences, 2015. 15(2): p. 368-377.	Yes	Yes											Yes	Yes	Yes	Yes	Yes											seven= 100%
11	Kendall et al.	2013	Kendall, E.A., Theron, D., Franke, M.F., Van Helden, P., Victor, T.C., Murray, M.B., et al., Alcohol, hospital discharge, and socioeconomic risk factors for default from multidrug resistant tuberculosis treatment in rural South Africa: a retrospective cohort study. PLoS One, 2013. 8(12).	Yes	Yes											Yes	Yes	Yes	Yes	Yes											seven= 100%
12	Merikki et al.	2013	Meriki, H.D., Tufon, K.A., Atanga, P.N., Ane-Anyangwe, I.N., Anong, D.N., Cho-Ngwa, F., et al., Drug resistance profiles of Mycobacterium tuberculosis complex and factors associated with drug resistance in the Northwest and Southwest Regions of Cameroon. PloS one, 2013. 8(10).	Yes	Yes											Yes	Yes	Can't tell	Can't tell	Yes											five= 71, 4%
13	Molie et al.	2019	Molie, T., Teklemariam, Z., Klinkenberg, E., Dessie, Y., Kumsa, A., Mohammed, H., et al., Intensive phase treatment outcome and associated factors among patients treated for multi drug resistant tuberculosis in Ethiopia: a retrospective cohort study. BMC infectious diseases, 2019. 19(1): p. 818.	Yes	Yes											Yes	Yes	Yes	No	Yes											six= 85, 7%
14	Oladimeji et al.	2016	Oladimeji, O., Ushie, B.A., Udoh, E.E., Oladimeji, K.E., Ige, O.M., Obasanya, O., et al., Psychosocial wellbeing of patients with multidrug resistant tuberculosis voluntarily confined to long-term hospitalisation in Nigeria. BMJ global health, 2016. 1(3): p. e000006.	Yes	Yes											Yes	Yes	Yes	Yes	Yes											seven= 100%
15	Alene et al.	2017	Alene, K.A., Viney, K., Mcbryde, E.S., and Clements, A.C.A., Spatial patterns of multidrug resistant tuberculosis and relationships to socio-economic, demographic and household factors in northwest Ethiopia. PloS one, 2017. 12(2).	Yes	Yes											Yes	Yes	Yes	Can't tell	Yes											six= 85, 7%
16	Moyo et al.	2015	Moyo, S., Cox, H.S., Hughes, J., Daniels, J., Synman, L., De Azevedo, V., et al., Loss from treatment for drug resistant tuberculosis: risk factors and patient outcomes in a community-based program in Khayelitsha, South Africa. PloS one, 2015. 10(3).	Yes	Yes											Yes	Yes	Yes	No	Yes											six= 85, 7%
17	Pedrazzoli et al.	2018	Pedrazzoli, D., Siroka, A., Boccia, D., Bonsu, F., Nartey, K., Houben, R., et al., How affordable is TB care? Findings from a nationwide TB patient cost survey in Ghana. Tropical Medicine & International Health, 2018. 23(8): p. 870-878.	Yes	Yes											Yes	Yes	Yes	No	Yes											six= 85, 7%
18	Oga-Omenka et al.	2020	Oga-Omenka C, Tseja-Akinrin A, Sen P, et al. Factors influencing diagnosis and treatment initiation for multidrug-resistant/rifampicinresistant tuberculosis in six sub-Saharan African countries: a mixed-methods systematic review. BMJ Global Health 2020;5:e002280. doi:10.1136/ bmjgh-2019-00228	Yes	Yes											Yes	Yes	Yes	No	Yes											six=85,7 TOTAL 113 OVER 126 = 89, 7 %
